# Supplementary material
Source: PubMed Central journal article supplement (PMC4534672)
Supplement: IAI.00312-15_zii999091369so1.pdf [file IAI.00312-15_zii999091369so1.pdf]

## Supplemental figure legends

**Figure S1.** The *arcA* mutant grew slightly worse than the WT under aerobic conditions and anaerobic conditions.

**Figure S2.** Deletion of *arcA* resulted significant decrease of bacterial burden in the brain tissue.

\* indicates significant (Fisher's test P-value<0.05) difference
