# Supplementary material
Source: PubMed Central journal article supplement (PMC4534672)
Supplement: IAI.00312-15_zii999091369so4.pdf [file IAI.00312-15_zii999091369so4.pdf]

**Table S1. Primers used in this study.**

| Primers                         | Sequence (5'-3')                                                                       |
|---------------------------------|----------------------------------------------------------------------------------------|
| <b>General PCR for cloning</b>  |                                                                                        |
| pGEN-arcA-F                     | CCGGAATTCATTGCCACTCTTCTTGACC                                                           |
| pGEN-arcA-R                     | CGCGGATCCTGATGTTTGTGACCCGTA                                                            |
| Pet28a-arcA-F                   | CATGCCATGGATGCAGACCCCGCACATTCT                                                         |
| Pet28a-arcA-R                   | CCCAAGCTTATCTTCCAGATCACCCGAGA                                                          |
| <b>For Deletion<sup>a</sup></b> |                                                                                        |
| Del-arcA-F                      | GGCAGGTCAGGGACTTTTGTACTTCCTGTTTCGATTTAGTT<br>GGCAATTTAGGTAGCAAACgtgtaggctggagctgcttcca |
| Del-arcA-R                      | AGGTAGAAAAATAAAAACGGCGCTAAAAAGCGCCGTTTT<br>TATTGACGGTGGTAAAGCCGAcatatgaatcctccttag     |
| Del-cheA-F                      | GAAAGCCAGAATGAGCCAGTAAGCGCCCTGGAAAAACCT<br>GAGGTTGCACCACAGGTCagtgtaggctggagctgcttcca   |
| Del-cheA-R                      | GCTGGCCAGCTTTGTTACATTCGTCATACCGGTCATATTGT<br>TACCTTTTTACTCATTCAgcatatgaatcctccttag     |
| Del-cheA&W-F                    | GAAAGCCAGAATGAGCCAGTAAGCGCCCTGGAAAAACCT<br>GAGGTTGCACCACAGGTCagtgtaggctggagctgcttcca   |
| Del-cheA&W-R                    | CCGATGCGCAGATCATCGGGTTCATTTCAATTGAGGAAAT<br>CGGGAGAATTACGCCACTTCcatatgaatcctccttag     |
| Del-motA&B-F                    | CGTGTTAACGCCTGACGACTGAACATCCTGTCATGGTCAA<br>CAGTGGAAAGGATGATGTCgtgtaggctggagctgcttcca  |
| Del-motA&B-R                    | TCGCTTATATCCATGCTCACGCTGTACCTCGGTTCCGGCTG<br>ATGGCATTGTGGGAACACTcatatgaatcctccttag     |
| Del-citCEFXG-F                  | TCCTTAGGATGTATAGCGAAAGGAGAAAAAGATATACCTC<br>GATCGCCCCCTTTCTCCCAAgtgtaggctggagctgcttcca |
| Del-citCEFXG-R                  | CTAAAGACATACGGGTTCTCCGAAAATTAATATTTCCAAA<br>TTTATCAAGTGCTTAAATAAcatatgaatcctccttag     |
| Del-flgBCDEFGHIJKL-F            | ATAACGCGCGCGTAAAGGCATTTAAGCTGATGGCAGAATT<br>TTGATACCTGCGGAGGAGAggtgtaggctggagctgcttcca |
| Del-flgBCDEFGHIJKL-R            | CACCTTCATCTGCATTTCAAACGCCGTGCGCTGGCAATC<br>ATGTCGCTCATTGCCGCAACcatatgaatcctccttag      |
| Del-fliCD-F                     | TTGTGCATAGGCCTGGGTGCCTTTTGCCGCGTACATGACCT<br>GTCTCCCGATGAATATTGAgtgtaggctggagctgcttcca |
| Del-fliCD-R                     | AGCACAGCGCACCAGGCAATTTGGCGTTGCCGTCAGTCTC<br>AGTTAATCAGGTTACGGCGAcatatgaatcctccttag     |

**Primers for reverse transcription qPCR**

|             |                          |
|-------------|--------------------------|
| tus-qPCR-F  | CGATAACCTTTCGCAAGCAGCGTT |
| tus-qPCR-R  | GGCAAATGACGATGCACCCATTCA |
| citC-qPCR-F | AATGATTTGAGCGTTGACACC    |
| citC-qPCR-R | TAATATTTCCGGCAATTCCAC    |
| cheA-qPCR-F | CAATGCCATCAGCCGAACCGAG   |
| cheA-qPCR-R | CCATATCAGCCAACAGTTCGT    |

|               |                          |
|---------------|--------------------------|
| cheW-qPCR-F   | TTTGCCGTGACGCTTTCAACC    |
| cheW-qPCR-R   | CGCCATCTCTTCGCTGT        |
| CheA&W-qPCR-F | AACAACGTATGGCGAACACC     |
| CheA&W-qPCR-R | GGCCAGCTTTGTTACATTCGTC   |
| motA-qPCR-F   | GCTTTCTAATCTGAACGGTTACGC |
| motA-qPCR-R   | TCCAGCTCAATAAACGACGGAC   |
| motB-qPCR-F   | TCCCAACCGAATTAGCCTCTCG   |
| motB-qPCR-R   | CAGAAAGCTCCCAGTTGCTGT    |
| motA&B-qPCR-F | AAAATCCGCAACAACAGACGAC   |
| motA&B-qPCR-R | GGCATAAGCAATCTTCCACGAT   |
| flgB-qPCR-F   | GCAGCAAACATCGCCAATGCC    |
| flgB-qPCR-R   | GTTGCATCCCGTCCACGTT      |
| grxA-qPCR-F   | ACAACAAAAGGCAGGTAAACCC   |
| grxA-qPCR-R   | GTCCAGATTCTCTTTCGCCCAT   |
| oppD-qPCR-F   | TGAACTCAATAAACTGCGAGCTG  |
| oppD-qPCR-R   | TTCCATCAACTGCTCACCGAC    |
| oppB-qPCR-F   | GAACCGTGACTATTCTTAGTGT   |
| oppB-qPCR-R   | TAACCGCATATAGCACATCGACA  |
| flgK-qPCR-F   | GGCGTCACCTAACAATCTGCT    |
| flgK-qPCR-R   | TGAACGCTGACTTCTACGCCAA   |
| glcF-qPCR-F   | TACGATCTCTCACGGTTAATGGC  |
| glcF-qPCR-R   | TCGCGGTAACACTTTCATCGAG   |
| lldR-qPCR-F   | AATGATGGCGCACCTTAGCTT    |
| lldR-qPCR-R   | TCCCTCGAATGCTCATTATGGTC  |
| yneI-qPCR-F   | TTGTGCTTAACGATGCCGAT     |
| yneI-qPCR-R   | TAAATGCCGAAGCAATTCCT     |
| fliC-qPCR-F   | CCAGTAGCTCCGTTAATCCCT    |
| fliC-qPCR-R   | AGTTTTGCTCAGTACACCGGAA   |
| fliD-qPCR-F   | CCTGACCAGTTGGCTTTCGAC    |
| fliD-qPCR-R   | ACGAGGTCATTAACCGTCCAGT   |

---

***Primers for checking motA/motB/cheA operon and PCR products for gel mobility shift assay***

|                |                         |
|----------------|-------------------------|
| MotA&B1-F      | TATCGCCGTTGAGTTTGGTC    |
| MotA&B1-R      | CGGGAATTGGGCTTTCACTA    |
| motB&cheA-F    | CCAGAATGAGCCAGTAAGCG    |
| motB&cheA-R    | GATTGATAATGTCGGTGTGAGTT |
| CheA&W1-F      | GCGTGGCACTGATTGTTGAT    |
| CheA&W1-R      | TGTGAGATATTCGGTTGAAAGC  |
| M-FGel shift-F | TTGCCGGTGCAGGGATTGGG    |
| M-FGel shift-R | TGCGTGGGTAGCTGGCGAAG    |

---

- Underlined are restriction cutting sites;

- Capital letters represent homologous fragments of the deleted genes.
