# Supplementary material
Source: PubMed Central journal article supplement (PMC4534672)
Supplement: IAI.00312-15_zii999091369so5.pdf [file IAI.00312-15_zii999091369so5.pdf]

**TABLE S2** Genes differentially regulated in *arcA* mutant strain versus WT strain, grown in duck serum

| Gene/locus name | Function or description of product                        | Fold change in expression | p-value  | q-value  |
|-----------------|-----------------------------------------------------------|---------------------------|----------|----------|
| <i>grxA</i>     | glutaredoxin 1                                            | -16.3                     | 4.60E-06 | 0.004279 |
| <i>flgB</i>     | cell-proximal portion of basal-body rod<br>FlgB           | -14.6                     | 0.001120 | 0.056753 |
| <i>FlgD</i>     | flagellar hook formation protein FlgD                     | -10.0                     | 0.001539 | 0.064927 |
| <i>FlgE</i>     | flagellar biosynthesis, hook protein FlgE                 | -7.0                      | 0.001448 | 0.063975 |
| <i>motA</i>     | flagellar motor protein MotA                              | -6.4                      | 1.40E-05 | 0.007796 |
| <i>ydgR</i>     | putative tripeptide transporter permease                  | -6.4                      | 0.001257 | 0.058511 |
| <i>FeoB</i>     | ferrous iron transport protein B                          | -6.0                      | 2.07E-05 | 0.009627 |
| <i>fliM</i>     | Flagellar motor switch protein                            | -5.2                      | 0.002583 | 0.077688 |
| <i>fhuC</i>     | iron-hydroxamate transporter subunit                      | -5.1                      | 0.003364 | 0.087784 |
| <i>fliD</i>     | flagellar capping protein                                 | -4.7                      | 0.000139 | 0.025915 |
| <i>amtB</i>     | putative ammonium transporter                             | -4.6                      | 0.001037 | 0.054607 |
| <i>fliH</i>     | flagellar assembly protein                                | -4.6                      | 0.000892 | 0.050819 |
| <i>FlgK</i>     | flagellar hook-associated protein                         | -4.5                      | 6.26E-05 | 0.017471 |
| <i>fliK</i>     | flagellar hook-length control protein                     | -4.4                      | 0.003865 | 0.094289 |
| <i>fliA</i>     | flagellar biosynthesis sigma factor FliA                  | -4.2                      | 0.001138 | 0.056753 |
| <i>glnQ</i>     | glutamine ABC transporter ATP-binding component           | -4.2                      | 0.002283 | 0.074080 |
| <i>motB</i>     | flagellar motor protein                                   | -4.1                      | 0.000682 | 0.045341 |
| <i>fliC</i>     | flagellin                                                 | -4.0                      | 0.000221 | 0.030852 |
| <i>yjdE</i>     | putative amino acid/amine transport protein, cryptic      | -4.0                      | 0.003041 | 0.084496 |
| <i>glnP</i>     | glutamine transport protein GlnP                          | -3.9                      | 0.001508 | 0.064759 |
| <i>CheA</i>     | chemotaxis protein CheA                                   | -3.9                      | 5.80E-05 | 0.017471 |
| <i>cheW</i>     | positive regulator of CheA protein activity               | -3.7                      | 0.000211 | 0.030852 |
| <i>flgH</i>     | flagellar basal body L-ring protein precursor             | -3.5                      | 0.003964 | 0.094430 |
| <i>cheY</i>     | chemotaxis protein CheY                                   | -3.5                      | 0.001637 | 0.065296 |
| <i>adiY</i>     | putative regulatory protein AdiY                          | -3.3                      | 0.003795 | 0.093765 |
| <i>cheR</i>     | chemotaxis regulator, protein-glutamate methyltransferase | -3.3                      | 0.000890 | 0.050819 |
| <i>ahpC</i>     | alkyl hydroperoxide reductase, C22 subunit                | -3.3                      | 0.001125 | 0.056753 |
| <i>tar</i>      | methyl-accepting chemotaxis protein II                    | -3.3                      | 0.003669 | 0.092843 |
| <i>oppD</i>     | oligopeptide transport ATP-binding protein OppD           | -3.2                      | 0.000808 | 0.050819 |
| <i>fliG</i>     | flagellar motor switch protein G                          | -3.2                      | 0.001927 | 0.069285 |
| <i>oppB</i>     | oligopeptide transport permease protein                   | -3.2                      | 0.000180 | 0.030852 |
| <i>citE</i>     | citrate lyase beta chain                                  | -3.2                      | 0.000557 | 0.041502 |

|                    |                                                               |      |          |          |
|--------------------|---------------------------------------------------------------|------|----------|----------|
| <i>APECO1_4385</i> | fructose-specific PTS system IIA component                    | -3.1 | 0.002645 | 0.078566 |
| <i>citF</i>        | citrate lyase alpha chain                                     | -3.1 | 0.002195 | 0.072548 |
| <i>flgI</i>        | flagella basal body P-ring-like protein FlgI                  | -3.0 | 0.003323 | 0.087538 |
| <i>cydA</i>        | cytochrome d terminal oxidase, subunit I                      | -3.0 | 0.002588 | 0.077688 |
| <i>gst</i>         | glutathione S-transferase                                     | -2.9 | 0.002125 | 0.072548 |
| <i>cheZ</i>        | chemotaxis regulator, protein phosphatase for CheY            | -2.9 | 0.001194 | 0.057478 |
| <i>oppC</i>        | oligopeptide transporter subunit                              | -2.8 | 0.000986 | 0.054607 |
| <i>ybjM</i>        | conserved hypothetical protein YbjM                           | -2.7 | 0.004209 | 0.094788 |
| <i>fdhF</i>        | formate dehydrogenase-H, selenopolypeptide subunit            | -2.7 | 0.002684 | 0.078873 |
| <i>flgL</i>        | flagellar hook-associated protein FlgL                        | -2.6 | 0.001671 | 0.065513 |
| <i>thrB</i>        | homoserine kinase                                             | -2.6 | 0.003279 | 0.087538 |
| <i>APECO1_3052</i> | conserved hypothetical protein                                | -2.5 | 0.001309 | 0.059587 |
| <i>frdB</i>        | iron-sulfur protein subunit of fumarate reductase             | -2.1 | 0.004294 | 0.094788 |
| <i>tsr</i>         | methyl-accepting chemotaxis protein I, serine sensor receptor | -2.1 | 0.002751 | 0.079994 |
| <i>zntA</i>        | lead, cadmium, zinc and mercury transporting ATPase           | -2.1 | 0.002335 | 0.074080 |
| <i>livM</i>        | leucine/isoleucine/valine transporter subunit LivM            | -2.0 | 0.003461 | 0.089486 |
| <i>yihF</i>        | conserved hypothetical protein                                | 2.2  | 0.003691 | 0.092843 |
| <i>fliR</i>        | flagellar biosynthetic protein FliR                           | 2.3  | 0.002534 | 0.077688 |
| <i>znuA</i>        | adhesin-like protein                                          | 2.4  | 0.001253 | 0.058511 |
| <i>APECO1_1702</i> | conserved hypothetical protein                                | 2.4  | 0.001794 | 0.066992 |
| <i>APECO1_1174</i> | hypothetical protein                                          | 2.4  | 0.002164 | 0.072548 |
| <i>ybiL</i>        | putative tonB-dependent receptor YbiL precursor               | 2.4  | 0.002961 | 0.084496 |
| <i>gudD</i>        | glucarate dehydratase                                         | 2.6  | 0.004337 | 0.094788 |
| <i>fimH</i>        | type 1 fimbrial adhesin FimH                                  | 2.8  | 0.004051 | 0.094788 |
| <i>iclR</i>        | aceBAK operon repressor                                       | 2.9  | 0.000880 | 0.050819 |
| <i>phoE</i>        | outer membrane pore protein E precursor                       | 2.9  | 0.004260 | 0.094788 |
| <i>cirA</i>        | ferric iron-catecholate outer membrane transporter            | 2.9  | 0.003913 | 0.094289 |
| <i>NmpC</i>        | outer membrane porin protein                                  | 2.9  | 0.001987 | 0.070225 |
| <i>yggR</i>        | conserved hypothetical protein                                | 3.0  | 0.001027 | 0.054607 |
| <i>APECO1_1700</i> | putative NADH-dependent flavin oxidoreductase                 | 3.0  | 0.003050 | 0.084496 |
| <i>APECO1_4448</i> | putative fructose-bisphosphate aldolase                       | 3.1  | 0.003255 | 0.087538 |
| <i>APECO1_4058</i> | hypothetical protein                                          | 3.2  | 0.003917 | 0.094289 |
| <i>crl</i>         | crl transcriptional regulator                                 | 3.2  | 0.001734 | 0.066338 |
| <i>APECO1_3393</i> | conserved hypothetical protein                                | 3.4  | 0.000482 | 0.041502 |
| <i>yaaX</i>        | conserved hypothetical protein                                | 3.4  | 0.000566 | 0.041502 |

|                    |                                                             |     |          |          |
|--------------------|-------------------------------------------------------------|-----|----------|----------|
| <i>bglH</i>        | carbohydrate-specific outer membrane porin, cryptic         | 3.5 | 0.003319 | 0.087538 |
| <i>APECO1_2187</i> | putative hexuronate transporter , D-galactonate transporter | 3.7 | 0.000339 | 0.037864 |
| <i>APECO1_1629</i> | conserved hypothetical protein                              | 3.7 | 0.003674 | 0.092843 |
| <i>yjcG</i>        | putative symporter YjcG                                     | 3.7 | 0.003991 | 0.094430 |
| <i>yhjE</i>        | putative metabolite transport protein YhjE                  | 3.7 | 0.001032 | 0.054607 |
| <i>ybcS2</i>       | bacteriophage lambda lysozyme-like protein                  | 3.8 | 0.001466 | 0.063975 |
| <i>ycgF</i>        | conserved hypothetical protein                              | 3.8 | 0.000264 | 0.03353  |
| <i>yjiJ</i>        | putative permease                                           | 4.0 | 0.000580 | 0.041502 |
| <i>cycA</i>        | transport of D-alanine, D-serine, and glycine               | 4.1 | 0.00459  | 0.098662 |
| <i>APECO1_2625</i> | putative 2-keto-3-deoxygalactokinase                        | 4.1 | 0.004346 | 0.094788 |
| <i>ydcJ</i>        | conserved hypothetical protein                              | 4.2 | 0.004384 | 0.094875 |
| <i>yjiK</i>        | SdiA-regulated                                              | 4.2 | 0.000508 | 0.041502 |
| <i>YlaC</i>        | conserved hypothetical protein                              | 4.2 | 7.19E-05 | 0.018243 |
| <i>malK</i>        | maltose/maltodextrin transport ATP-binding protein MalK     | 4.3 | 0.001323 | 0.059587 |
| <i>mgo</i>         | malate:quinone oxidoreductase                               | 4.3 | 0.000448 | 0.041502 |
| <i>APECO1_2112</i> | FimF protein precursor                                      | 4.3 | 0.001580 | 0.064927 |
| <i>glcB</i>        | malate synthase G                                           | 4.4 | 0.001803 | 0.066992 |
| <i>yjaE</i>        | Regulator of sigma D                                        | 4.4 | 0.001588 | 0.064927 |
| <i>metF</i>        | 5,10-methylenetetrahydrofolate reductase                    | 4.6 | 0.002494 | 0.077688 |
| <i>IclR</i>        | Bacterial transcriptional regulator,                        | 4.7 | 0.000204 | 0.030852 |
| <i>metA</i>        | homoserine O-succinyltransferase MetA                       | 4.9 | 0.004344 | 0.094788 |
| <i>yigI</i>        | conserved hypothetical protein                              | 5.0 | 0.000308 | 0.037352 |
| <i>FimA</i>        | P pilus assembly protein, pilin FimA                        | 5.0 | 0.001166 | 0.057068 |
| <i>APECO1_2442</i> | conserved hypothetical protein                              | 5.1 | 0.000765 | 0.049697 |
| <i>glcC</i>        | conserved hypothetical protein                              | 5.4 | 0.002041 | 0.071217 |
| <i>fimA</i>        | type 1 fimbriae major subunit FimA                          | 5.6 | 0.002990 | 0.084496 |
| <i>CreD</i>        | colicin E2 resistance                                       | 6.0 | 0.000189 | 0.030852 |
| <i>fimD</i>        | outer membrane usher protein FimD precursor                 | 6.1 | 0.000360 | 0.038607 |
| <i>APECO1_4163</i> | putative oxalyl-CoA decarboxylase                           | 6.2 | 0.001936 | 0.069285 |
| <i>yfdV</i>        | putative transporter protein                                | 6.7 | 0.002330 | 0.074080 |
| <i>ydcI</i>        | putative transcriptional regulator YdcI                     | 7.2 | 0.003092 | 0.084627 |
| <i>fimI</i>        | FimI fimbrial protein                                       | 7.5 | 0.000443 | 0.041502 |
| <i>APECO1_279</i>  | conserved hypothetical protein                              | 7.6 | 0.001824 | 0.066992 |
| <i>envR</i>        | putative acrEF/envCD operon repressor                       | 7.6 | 0.000623 | 0.042437 |
| <i>PapD</i>        | type I fimbrial chaperone                                   | 8.2 | 3.06E-05 | 0.012203 |
| <i>ybgO</i>        | conserved hypothetical protein                              | 8.7 | 0.000558 | 0.041502 |
| <i>yjcH</i>        | conserved hypothetical protein                              | 9.2 | 0.002209 | 0.072548 |
| <i>YfdX</i>        | conserved hypothetical protein                              | 9.4 | 0.000244 | 0.032421 |
| <i>APECO1_282</i>  | conserved hypothetical protein                              | 9.7 | 0.000328 | 0.037864 |

|                    |                                                                                         |      |          |          |
|--------------------|-----------------------------------------------------------------------------------------|------|----------|----------|
| <i>putP</i>        | proline:sodium symporter                                                                | 10.3 | 0.001604 | 0.064927 |
| <i>kgtP</i>        | alpha-ketoglutarate permease                                                            | 10.5 | 8.06E-05 | 0.018753 |
| <i>yneI</i>        | aldehyde-dehydrogenase like protein<br>YneI                                             | 10.9 | 2.17E-06 | 0.003032 |
| <i>ybiW</i>        | putative formate acetyltransferase 3                                                    | 11.3 | 0.004220 | 0.094788 |
| <i>fruA</i>        | PTS system, fructose-like-2 IIC<br>component                                            | 11.5 | 0.004233 | 0.094788 |
| <i>yfdW</i>        | formyl-coenzyme A transferase                                                           | 11.5 | 0.000491 | 0.041502 |
| <i>APECO1_1268</i> | transaldolase-like protein                                                              | 11.7 | 0.002201 | 0.072548 |
| <i>nanA</i>        | N-acetylneuraminic lyase                                                                | 11.8 | 0.000452 | 0.041502 |
| <i>malG</i>        | maltose transport system permease<br>protein MalG                                       | 12.9 | 0.000412 | 0.041502 |
| <i>malE</i>        | Maltose-binding periplasmic proteins                                                    | 13.0 | 0.000613 | 0.042437 |
| <i>ptsA</i>        | phosphoenolpyruvate-protein<br>phosphotransferase PtsA                                  | 14.4 | 0.003783 | 0.093765 |
| <i>putA</i>        | delta-1-pyrroline-5-carboxylate<br>dehydrogenase                                        | 15.7 | 0.004241 | 0.094788 |
| <i>glcD</i>        | glycolate oxidase subunit D                                                             | 17.5 | 4.03E-05 | 0.014079 |
| <i>ybiY</i>        | putative pyruvate formate lyase<br>activating enzyme                                    | 20.3 | 0.001689 | 0.065513 |
| <i>lldD</i>        | L-lactate dehydrogenase, FMN-linked                                                     | 24.6 | 0.000112 | 0.022287 |
| <i>malF</i>        | maltose transport system permease<br>protein MalF                                       | 25.2 | 0.000554 | 0.041502 |
| <i>lldR</i>        | DNA-binding transcriptional repressor                                                   | 31.9 | 0.000111 | 0.022287 |
| <i>lamB</i>        | maltoporin precursor                                                                    | 32.4 | 0.000532 | 0.041502 |
| <i>malM</i>        | maltose operon periplasmic protein<br>precursor MalM                                    | 32.6 | 0.000850 | 0.050819 |
| <i>acs</i>         | acetyl-CoA synthetase                                                                   | 33.1 | 0.003057 | 0.084496 |
| <i>yjhT</i>        | conserved hypothetical protein , N-<br>acetylneuraminic acid mutarotase;<br>Provisional | 33.9 | 0.002518 | 0.077688 |
| <i>lldP</i>        | L-lactate permease                                                                      | 36.6 | 0.000840 | 0.050819 |
| <i>glcF</i>        | glycolate oxidase iron-sulfur subunit                                                   | 42.5 | 7.25E-06 | 0.005058 |
