# Supplementary material
Source: PubMed Central journal article supplement (PMC4534672)

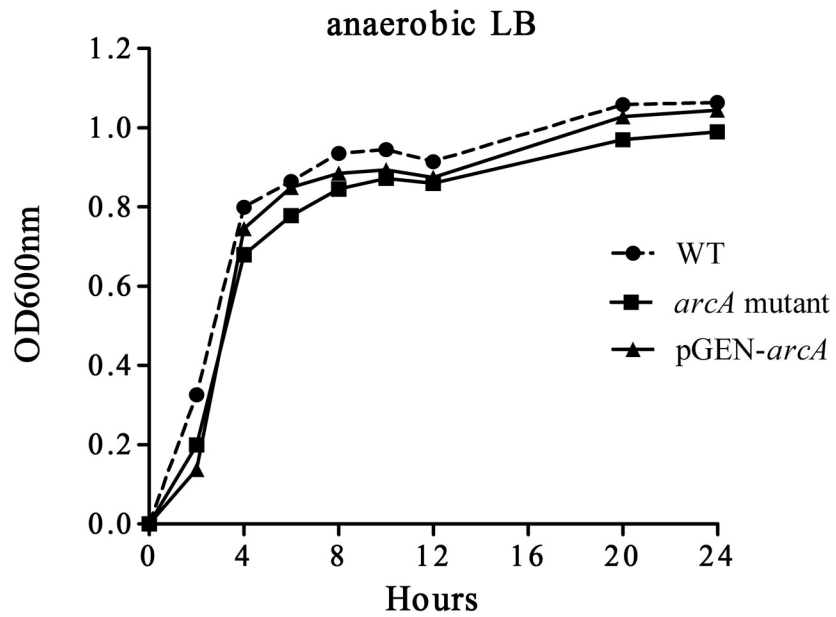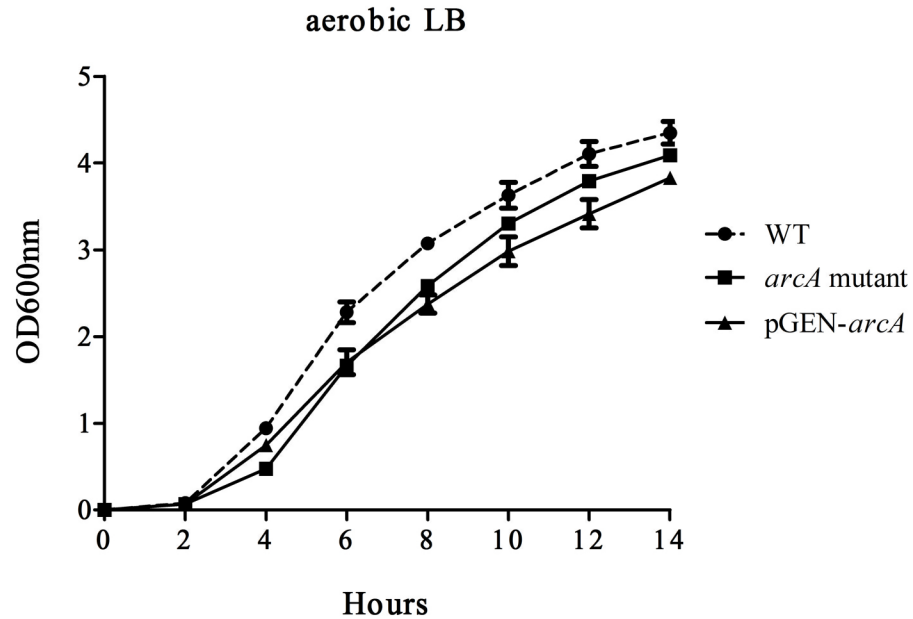

Supplement: IAI.00312-15_zii999091369so2.pdf [file IAI.00312-15_zii999091369so2.pdf]

Log<sub>10</sub>CFU/g brain

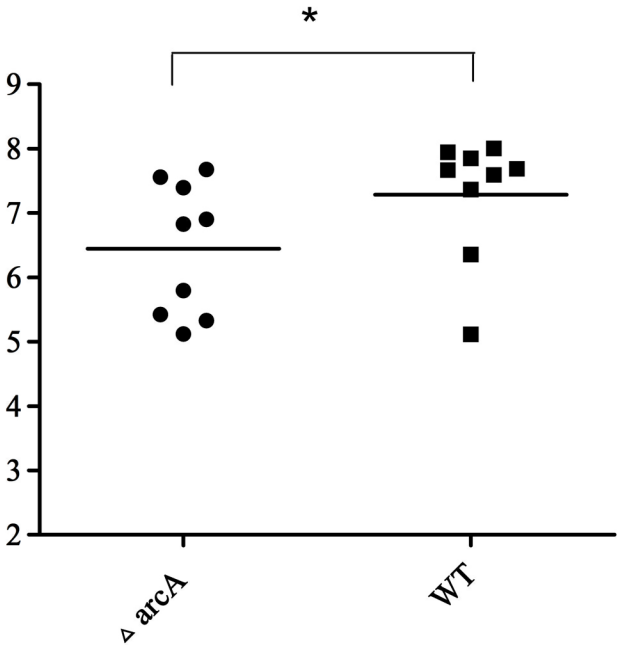

Supplement: IAI.00312-15_zii999091369so3.pdf [file IAI.00312-15_zii999091369so3.pdf]
